# Supplementary material for: BINARY: an optical freezing array for assessing temperature and time dependence of heterogeneous ice nucleation
Source: Copernicus journal article supplement (doi:10.5194/amt-8-689-2015), 2015-02-10
Supplement: Supplementary file 1 [file amt-8-689-2015-supplement.zip]

We provide a video in the supplementary material of a typical experiment during one cooling/heating cycle of an entire array shown in Fig. S1. The analysis of this experiment is described exemplarily for one drop in detail in the main paper text (see section 3 and Fig. 2.)

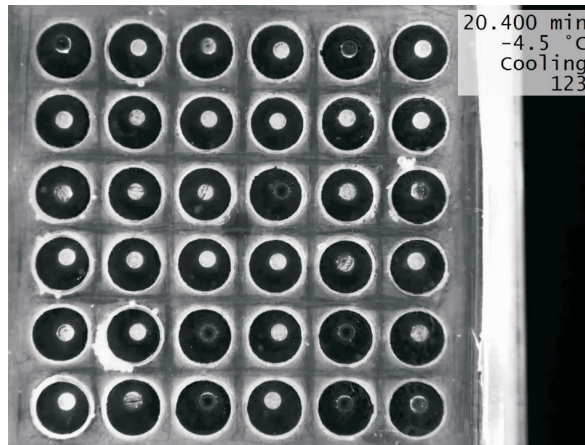

**Fig. S1.** Screenshot from a video of an example experiment with droplets containing Snomax<sup>®</sup> ( $0.1 \mu\text{g drop}^{-1}$ ) describing the automatic detection of nucleation events by the change in brightness during freezing. Corresponding detailed information regarding the analysis is presented in Fig. 2 in the main text.
