# Supplementary material for: BINARY: an optical freezing array for assessing temperature and time dependence of heterogeneous ice nucleation
Source: Copernicus journal article supplement (doi:10.5194/amt-8-689-2015), 2015-02-10
Supplement: Supplementary file 2 [file amt-8-689-2015-supplement.zip]

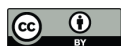

## *Supplement of*

# **BINARY: an optical freezing array for assessing temperature and time dependence of heterogeneous ice nucleation**

**C. Budke and T. Koop**

*Correspondence to:* T. Koop ([thomas.koop@uni-bielefeld.de](mailto:thomas.koop@uni-bielefeld.de))

- [amt-8-689-2015-supplement-cover-letter.pdf](#)
- [BINARY\\_supplement\\_AMTproduction.pdf](#)
- [video.mp4](#)
